# Supplementary material
Source: MDPI journal article supplement (https://www.mdpi.com/2072-4292/15/17/4128)
Supplement: s1 [file s1]

# Supplementary file

## Content

|   |                                                                                                                                                    |   |
|---|----------------------------------------------------------------------------------------------------------------------------------------------------|---|
| ✧ | <i>Figure S1. Aerial photographs respectively acquired in 2018(a) and 2020(b).</i>                                                                 | 2 |
| ✧ | <i>Figure S2. The original offsets of individual trees between aerial photographs and CHMs derived from airborne LiDAR data in six landscapes.</i> | 3 |

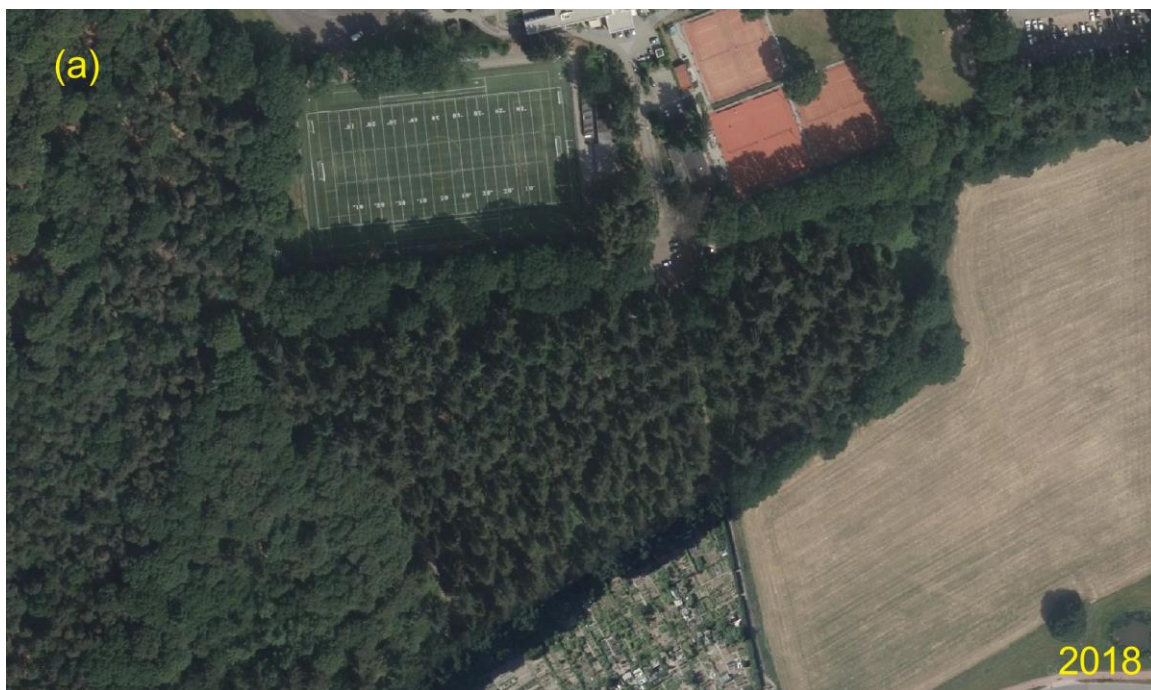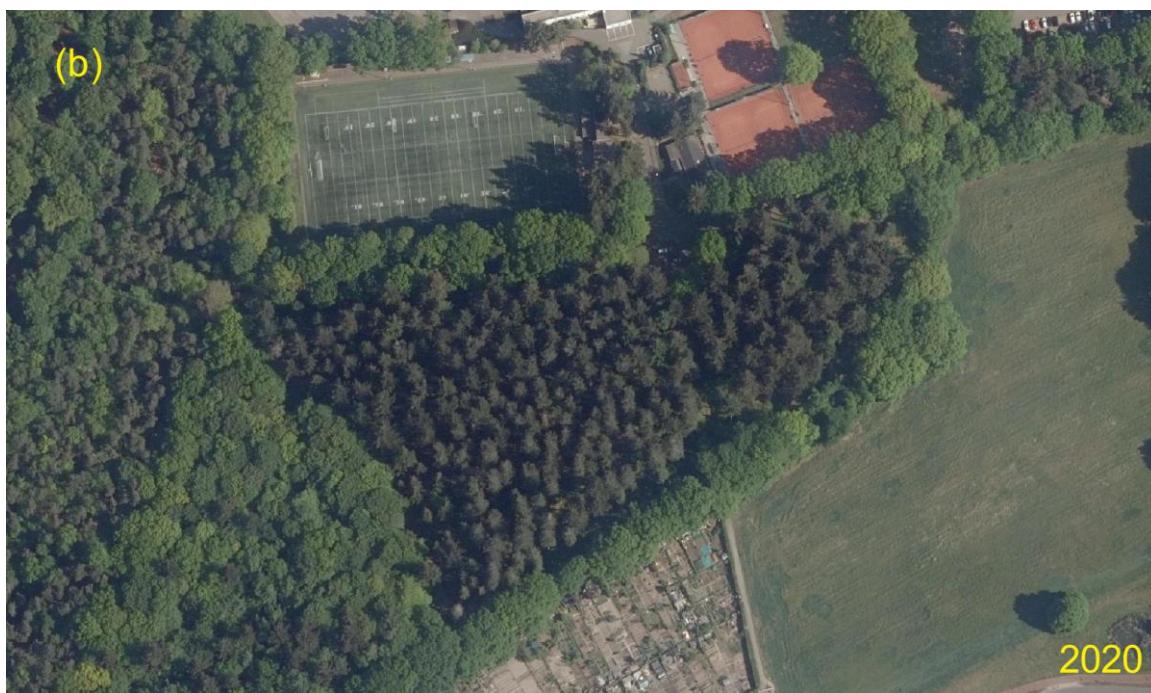

Figure S1. Aerial photographs respectively acquired in 2018(a) and 2020(b).

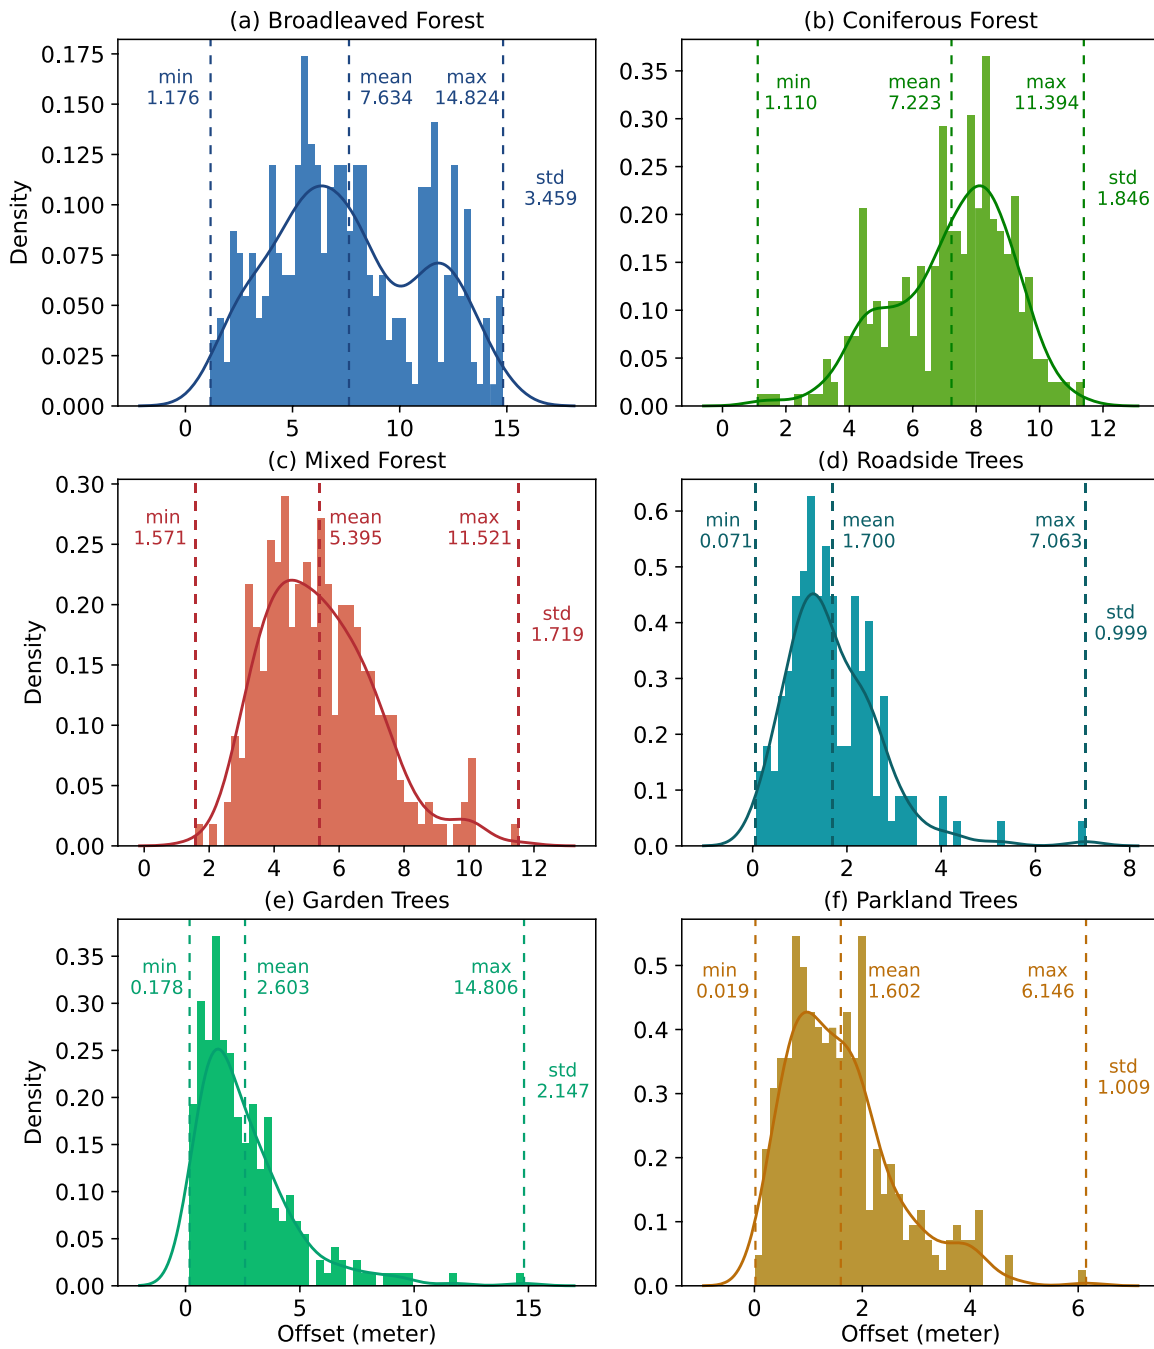

Figure S2. The original offsets of individual trees between aerial photographs and CHMs derived from airborne LiDAR data in six landscapes.
